# Supplementary material
Source: PubMed Central journal article supplement (PMC2566955)
Supplement: NIHMS63861-supplement-2si20061013_06.pdf [file NIHMS63861-supplement-2si20061013_06.pdf]

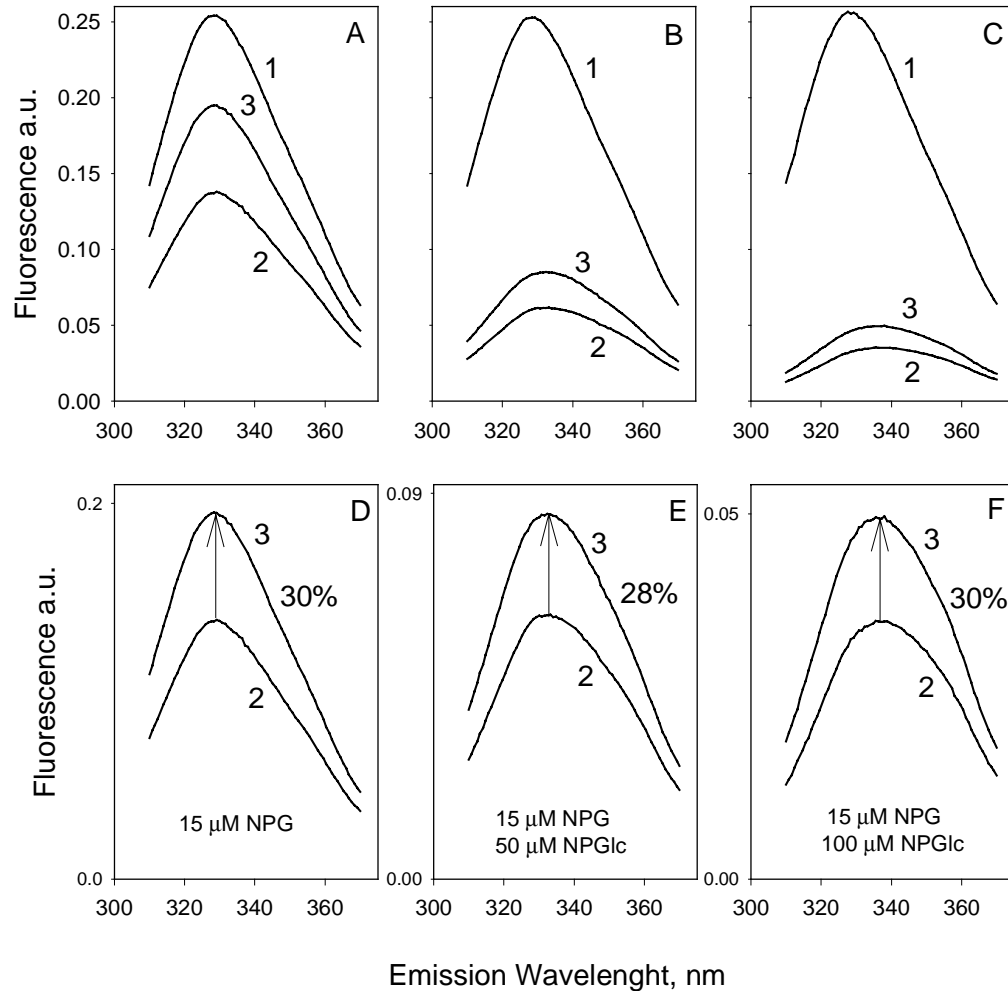

**Figure 1S.** Trp $\rightarrow$   $\alpha$ -NPG FRET measured as a result of 15  $\mu$ M  $\alpha$ -NPG binding to LacY and displacement with 10 mM TDG in three steady-state experiments at different levels of nonspecific IFE generated by addition of  $\alpha$ -NPGlc, which displays exactly the same IFE as  $\alpha$ -NPG but does not bind to LacY. **A:** no  $\alpha$ -NPGlc. **B:** 50  $\mu$ M  $\alpha$ -NPGlc. **C:** 100  $\mu$ M  $\alpha$ -NPGlc. Trp emission spectra (ex. 295 nm) are: 1, protein before additions; 2, after addition of  $\alpha$ -NPG or  $\alpha$ -NPG +  $\alpha$ -NPGlc; 3, after displacement of  $\alpha$ -NPG with 10 mM TDG. **D, E** and **F** demonstrate only specific fluorescence changes in experiments **A, B** and **C**, respectively, and are shown for clarity.
